# Supplementary material
Source: PubMed Central journal article supplement (PMC7359658)
Supplement: Supplemental_Material.pdf [file Supplemental_Material.pdf]

**Supplemental Table 1: Laboratory Investigations**

| <b>Gestational Age:</b> | <b>K+ mmol/L<br/>(N 3.5-5.0)<br/>(N 3.3-5.0)*</b> | <b>Na+ mmol/L<br/>(N 135-145)<br/>(N 129-148)*</b> | <b>Cl- mmol/L<br/>(N 98-107)<br/>(N 97-109)*</b> | <b>HCO<sub>3</sub>-<br/>mmol/L<br/>(N 22-29)<br/>(N 18-26)*</b> | <b>Cr umol/L<br/>(N 55-100)<br/>(N 35-71)*</b> |
|-------------------------|---------------------------------------------------|----------------------------------------------------|--------------------------------------------------|-----------------------------------------------------------------|------------------------------------------------|
| <b>16 wks</b>           | 3.4                                               | 138                                                | 100                                              | 25                                                              | 69                                             |
| <b>17 wks</b>           | 3.5                                               | 134                                                | 101                                              | 21                                                              | 65                                             |
| <b>18 wks</b>           | 3.1                                               | 135                                                | 100                                              | 24                                                              | 63                                             |
| <b>23 wks</b>           | 3.5                                               | 139                                                | 102                                              | 24                                                              | 67                                             |
| <b>31 wks</b>           | 3.7                                               | 137                                                | 104                                              | 23                                                              |                                                |
| <b>0 days PP</b>        | 3.7                                               | 136                                                | 104                                              | 20                                                              | 72                                             |
| <b>3 wks PP</b>         | 4.2                                               | 140                                                | 104                                              | 24                                                              | 101                                            |

GA = Gestational age; PP = post-partum; \*second trimester reference range<sup>1</sup>

1. Abbassi-Ghanavati M, Greer LG and Cunningham FG. Pregnancy and laboratory studies: a reference table for clinicians. *Obstet Gynecol.* 2009; 114: 1326-31.
